# Supplementary material for: Systemically interfering with immune response by a fluorescent cationic dendrimer delivered gene suppression
Source: Royal Society of Chemistry journal article supplement (doi:10.1039/c4tb00411f), 2014-01-01
Supplement: c4tb00411f1.pdf [file c4tb00411f1.pdf]

## Supporting Information

### Systemically interfering with immune response by a fluorescent cationic dendrimer delivered gene suppression

Dongxu Shen,<sup>a</sup> Fan Zhou,<sup>a</sup> Zejun Xu,<sup>b</sup> Bicheng He,<sup>a</sup> Miao Li,<sup>a</sup>

Jie Shen,<sup>\*a</sup> Meizhen Yin,<sup>\*b</sup> and Chunju An<sup>\*a</sup>

<sup>a</sup> Department of Entomology, China Agricultural University, 100193 Beijing, China,

E-mail: [shenjie@cau.edu.cn](mailto:shenjie@cau.edu.cn); [anchunju@cau.edu.cn](mailto:anchunju@cau.edu.cn)

<sup>b</sup> State Key Laboratory of Chemical Resource Engineering, Key Laboratory of Carbon Fiber and Functional Polymers, Ministry of Education, Beijing University of Chemical Technology, 100029

Beijing, China, E-mail: [yinmz@mail.buct.edu.cn](mailto:yinmz@mail.buct.edu.cn)

**Table S1.** Nucleotide sequences of used primers

| Gene                                                              | Forward primer                                              | Reverse primer                                                |
|-------------------------------------------------------------------|-------------------------------------------------------------|---------------------------------------------------------------|
| <i>Amplification of the 821-bp fragment for serpin-3 labeling</i> |                                                             |                                                               |
| <i>serpin-3</i>                                                   | 5'-TTGCCACGAGTCCTACA-3'                                     | 5'-GCCATCGGCCAAGGTGGGGTTCG-3'                                 |
| <i>Synthesis of dsRNA</i>                                         |                                                             |                                                               |
| <i>serpin-3</i>                                                   | 5'-<br><u>TAATACGACTCACTATAGGCTTCCAT</u><br>AACCTCCTGC -3'  | 5'-<br><u>TAATACGACTCACTATAGGACACGCT</u><br>GTCCAAGTGCG -3'   |
| <i>GFP</i>                                                        | 5'-<br><u>TAATACGACTCACTATAGGCACAAGT</u><br>TCAGCGTGCCG -3' | 5'-<br><u>TAATACGACTCACTATAGGGTTCACCT</u><br>TGATGCCGTTTC -3' |
| Sequence for T7 promoter is underlined.                           |                                                             |                                                               |
| <i>qRT-PCR analysis</i>                                           |                                                             |                                                               |
| <i>serpin-3</i>                                                   | 5'-ATTGCAGCACAAATCGCCCC-3'                                  | 5'-GTGGGCAACTGCTGCAAAC-3'                                     |
| <i>lectin</i>                                                     | 5'-GTCGTCGTACCTGGCCATCA-3'                                  | 5'-AGAAGTCGCCCTGGACATCG-3'                                    |
| <i>PGRP</i>                                                       | 5'-TATGCGGGGCATGCAGAACT-3'                                  | 5'-CCCATCCGCGACCTTCGTAT-3'                                    |
| <i>βGRP</i>                                                       | 5'-GCCATGGCGCCTTTTGATGA-3'                                  | 5'-TCGTACCACGGCTTGGAGTC-3'                                    |
| <i>rpL8</i>                                                       | 5'-AAGCGAGGAACATCAGCC-3'                                    | 5'-GGTCTTGCCACCACGAAT-3'                                      |
| <i>cecropin</i>                                                   | 5'-CGCTTGTTTCATGGCGTTCG-3'                                  | 5'-ACGATGCCGTCTCGGATGTT-3'                                    |
| <i>gloverin</i>                                                   | 5'-GGAGACCTCACTGCTGACCA-3'                                  | 5'-GTGCTCGTAGCCAGCTTTGC-3'                                    |
| <i>moricin</i>                                                    | 5'-CCCTGCCCTAAGGTTCTG-3'                                    | 5'-CTGTAGACGTCGTGGGCTGT-3'                                    |
| <i>Imd</i>                                                        | 5'-AGATCATGACAAACGAGGCAGT-3'                                | 5'-TTGCTGCCAAACTGGACACC-3'                                    |

*Toll*

5'-AGAAGTTGCGGTCGCGTTG-3'

5'-GTGATGGTGCCTGTGCATCG-3'

---

```

1  GAAAAAACCGGTACATACCTTCCCAGGTCGTCATCGCATCAACTGACCGACCACTGAGTTTGGCAGCTCAGTCGCGCCCTACCCACGG
88  ACTGGGCCGCTTGTGTGAATCATGATTCAATAAACCAAATACCCTGTGCGGTGCTAACAGTGTTCAAAACCTCCAAAATAATATAA
175  TTAAGGCGCGGATCTCAATCGCCTTGAAGTTAATTTTTCTGTGTGTTTTCTTATCAACATAATGACTCCAAGATTTATTTCACA
-19  M T P R F Y F T
262  CTTTTGTAGTGGGCCAGCACTATGTGTAGCCCAACAAATCGACCCGAACACCCTGATCAACGTGTTTGGAAACCCCGCAACTAC
-11  L F V V G P A L C V A Q Q I D P N T L I N V F G T P S N Y
349  GCTGCGTCTGTGAACCCCATGACCCTGCTGCGAGTGGAGTGCCGTTGGCCAGGCCCTGCCTGTGAAACCTATTAACGAAACCCTC
19  A A S V N P H D P A A S G V P L A Q A L P V K P I N E T L
436  ACTGATCCCGACTATTGGGATATAGATGAGCTGCCGGCAGCAGCGGTAGCTGACTATGATAAGTTTGGACTGGAGTTTACTAAGAGG
48  T D P D Y W D I D E L P A A A V A D Y D K F D W S L T K R
523  CTATCAGTTCCTCAGATACCAACTTCCTTCTGTCTCCCTGGGTCTGAAGCTAGCCCTGGCCATCCTAACGGAAGCCGCGACCCGA
77  L S A S S D T N F L L S P L G L K L A L A I L T E A A T G
610  CTGACCAGGTCAGAGTTGCAGTCGGTGTGGGTTTTGAAATGGATAGAGTGGCTGTTAGAAGAAAGTTCCGGAACATAGTTAATTTCA
106  L T R S E L Q S V L G F E M D R V A V R R K F A N I V N S
697  TTGAGCACAATCGCCCTATACGTCCTTACTTAGGTAGTAAATCTATGTGGAGAACATTGCCACCCTCGTCAGAAGTTTGGCA
135  L Q H K S P L Y V L D L G S K I Y V E N I A H P R Q K F A
784  GCAGTTGCCACGAGTCTACAAAACGGACCTGACTCCCATCGACTTCCATAACCCTCCTGCAGCCGCAAGCCATCAACGATTGG
164  A V A H E S Y K T D L T P I D F H N P P A A A K A I N D W
871  GTTGCCAACTTACCCAGGAAGGATCACTGACTTAGTACATCAAGATGACCTCGAAAACGTTGGTGGTGTATGATCCTCAACACACTA
193  V A N L T Q G R I T D L V H Q D D L E N V V V M I L N T L
958  TACTTCAAGGGCAGCTGGCGCCACCAGTTCGCGCCCAACGCTACCAAGCAGGGTCAATTCTACGTCACCCCGAAAATAGCTAAACCA
222  Y F K G S W R H Q F A P N A T K Q G Q F Y V T P K I A K P
1045  GTGTATTTATGAATGTGAAGGACAAGTTCTACTATGTGAGTCTGCCAAATTCGACGCTAAGATCCTCAGGATGCCATACATGGGC
251  V Y F M N V K D K F Y Y A E S A K F D A K I L R M P Y M G
1132  TACAAATTTGCAATGTACGTAGTAGTTCCCAACTCATTGACTGGTCTGAACCGAGTATTGGATGGTCTGACGGAGCTCCGCCCGAA
280  Y K F A M Y V V V P N S L T G L N R V L D G L T E L R P E
1219  ATGGATTTGTTACAAGAGCGCTTCGTCGACGTCACCTTTGCCAGATTCCAGTTTCAATTCTCCTCGCACTTGGACAGCGTGTGAGA
309  M D L L Q E R F V D V T L P R F Q F E F S S H L D S V L R
1306  GATATGGGTGTGACACAAGCCTTCGAGGACACTGCGTCTCCCTGGCATCGCCAGGGGACAGTCCCTGCAGCAGCGCTCAGGGTC
338  D M G V R Q A F E D T A S F P G I A R G Q S L Q Q R L R V
1393  TCCAAGTTCTGCAGCGGTCGGGCATCGAGGTCAACGAGCTCGGAAGTGTGGCCTACTCAGTACTGAAATATCTCTAGTCAACAAA
367  S K V L Q R S G I E V N E L G S V A Y S A T E I S L V N K
1480  TTCGGCAGGATGACGATACCGCTGTGGAGGTGATCGCCAACAAGCCCTTCTTCTCCTGATCCAAGATGAGACGACCAGGCAACTG
396  F G E D D D T A V E V I A N K P F F F L I Q D E T T R Q L
1567  CTGTTACGGGCAGAGTGGCCGACCCACCTTGGCCGATGGCACTTTCAAACACTCATAGGTTATTTTAGGGTTAGGGATGCCCTTT
425  L F T G R V A D P T L A D G T F K H S *
1654  TAGTAATCGCCGACTGAAACTTCCTTGATTCTTAAGTTAAAATTTCCACAGGCTCTTGCTTTGGGTAATTTTGTGTTTCAACTGAAC
1741  TTGATAATGCCCTGAAGTGTATTACTCGTATAATGTTTTTCTAATAGCTTATGATAATGTGGTCAGCTTTTAAACCATCTTACGT
1828  GGCCAGAAGTGTAGAATATTGTAGATAGGATACAGCTATCGTTTAAAGTTTTGGAAAGGTGATTACTGAGAGGCATAATATTGTTT
1915  AAGTCATTAGTCTAAGTCCATGTAATTATCATGATATGATGAAATCAGGCACGATATAGAAGTCAATGTTAAGAATATTAGTAG
2002  GTACATGATGGCTCTCTTTGATTCGATCTGTGATCTGTTAACAATTTATACGAAGTAAAAATATATCAAAACCAAGGTTATTGAAG
2089  CATGTGCCATTGATGCCTTTGACTCTACCTCTTGCAATTTTATAAAAACACATAATAAAATGACATTTTGTATCCTAAAAA

```

**Figure S1.** Nucleotide and amino acid sequence of *O. furnacalis* serpin-3. The deduced amino acid sequence is shown below the nucleotide sequence of serpin-3 (GenBank™ accession number KF501490). The one-letter code for each amino acid is aligned with the second nucleotide of the corresponding codon. The stop codon is marked with *asterisk* (\*). The primers for amplifying *serpin-3* DNA and dsRNA fragment are underlined and double-underlined, respectively.

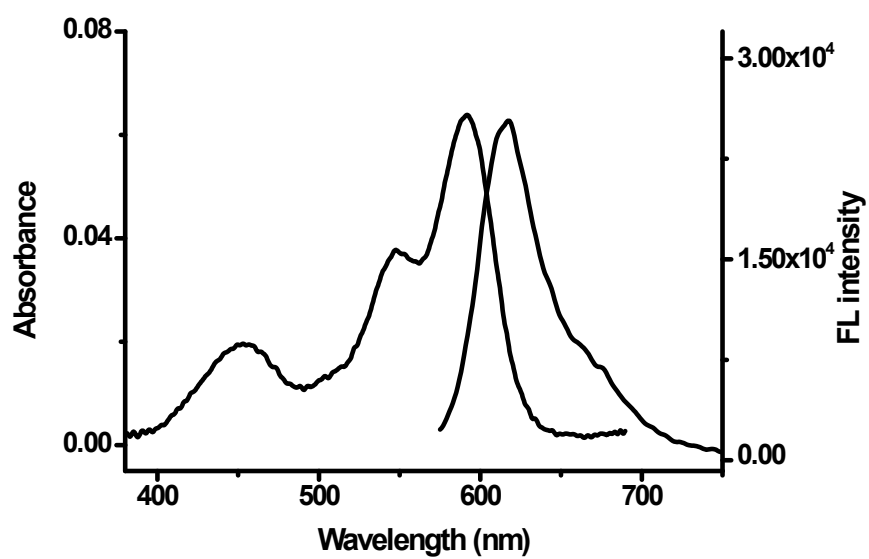

**Figure S2.** Absorption and emission spectra of G2 in water (concentration:  $2 \times 10^{-6}$  M,  $\lambda_{\text{ex}} = 545$  nm).

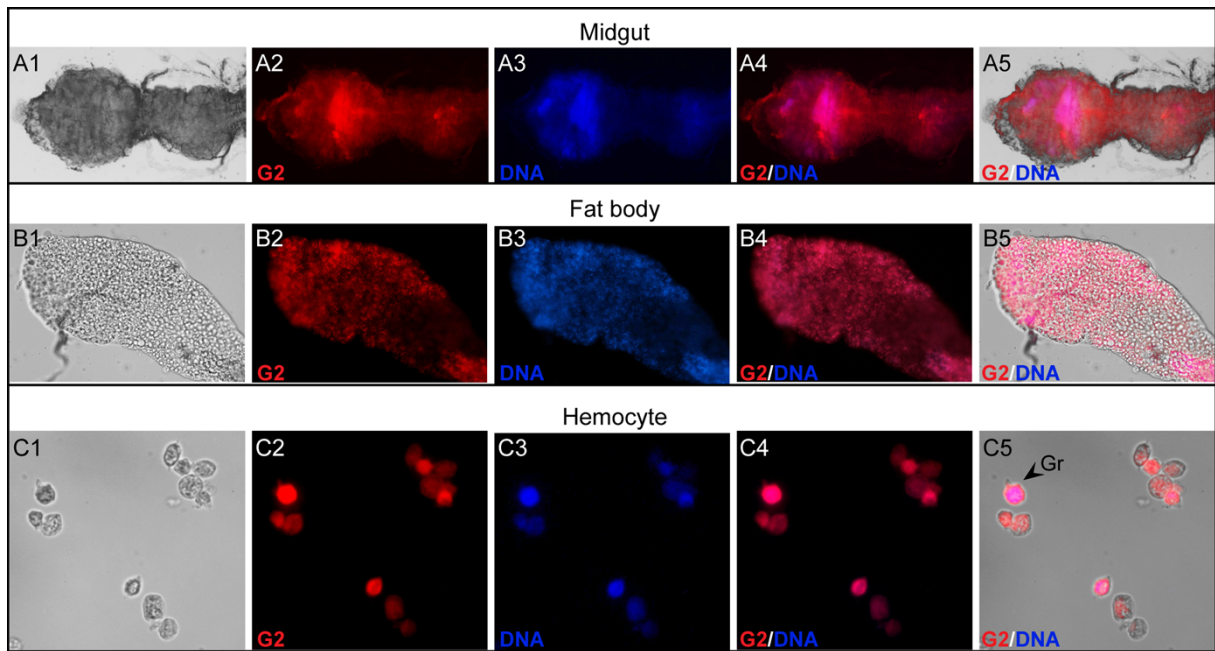

**Figure S3.** Fluorescence images of G2/DNA complexes (N/P= 2:1) after 8 h incubation with *O. furnacalis* midgut (A1-A5), fat body (B1-B5), and hemocyte (C1-C5). A1, B1 and C1: separated channels for tissues or cells only. A2, B2, and C2: separated channels for G2 (red). A3, B3, and C3: separated channels for DNA labeled by CXR Reference Dye (blue). A4, B4, and C4: merged images from the second and third one on the left. A5, B5, and C5: merged images from the three ones on the left. Gr: granulocyte

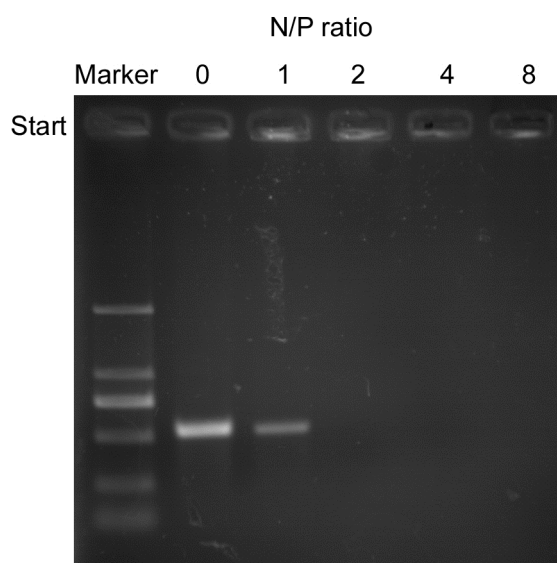

Figure S4. Agarose gel electrophoresis of G2/DNA complexes at various N/P ratios.

**Table S2.** Particle sizes of G2 before and after it forms a complex with DNA at N/P = 8:1.

|        | Average size(nm) |
|--------|------------------|
| G2     | $1.8 \pm 0.3$    |
| DNA    | $1318.3 \pm 3.2$ |
| G2/DNA | $136.5 \pm 3.4$  |

**Table S3.** The zeta-potentials of G2 before and after it form complexes with DNA at N/P = 8:1.

|        | Zeta potential<br>(mV) |
|--------|------------------------|
| G2     | $13.3 \pm 0.8$         |
| DNA    | $-24.2 \pm 0.5$        |
| G2/DNA | $11.6 \pm 1.2$         |
